# Supplementary material for: Integrative genomic analysis identifies epigenetic marks that mediate genetic risk for epithelial ovarian cancer
Source: PubMed Central journal article supplement (PMC3916313; doi:10.1186/1755-8794-7-8), 2014-01-30

**Figure S1:** Plot of the first two principal components computed from the raw DNA methylation data. Black points indicate samples from Batch 1 ( $n = 132$ ) and red points indicate samples from Batch 2 ( $n = 296$ ).

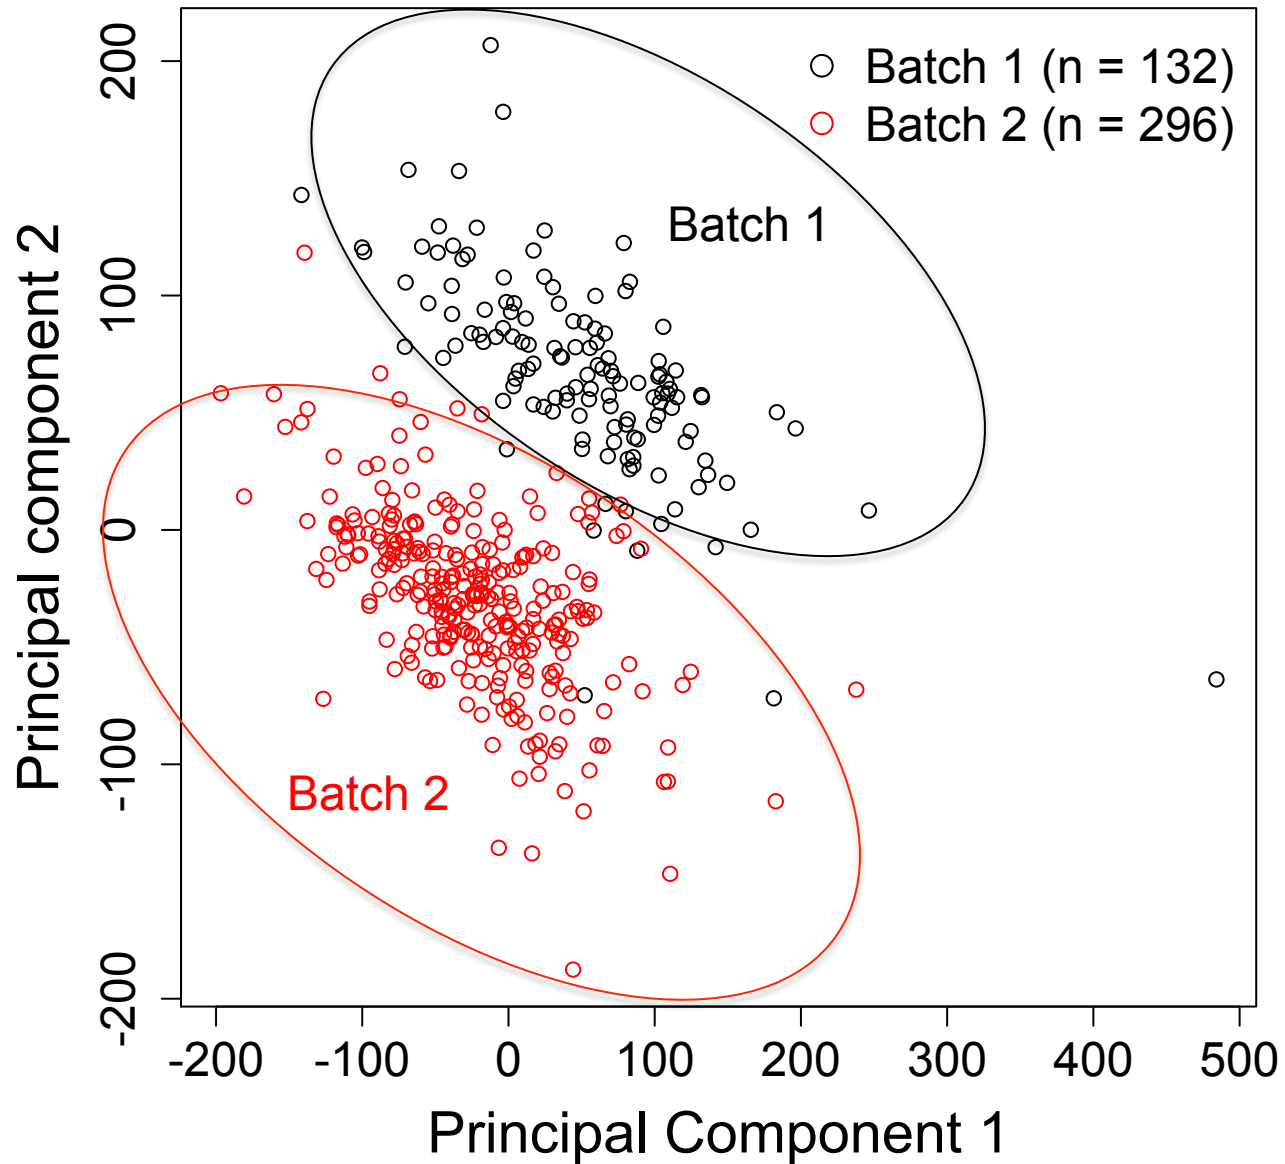

Supplement: 1755-8794-7-8-S2.pdf [file 1755-8794-7-8-S2.pdf]
