# Supplementary material for: Integrative genomic analysis identifies epigenetic marks that mediate genetic risk for epithelial ovarian cancer
Source: PubMed Central journal article supplement (PMC3916313; doi:10.1186/1755-8794-7-8), 2014-01-30
Supplement: 1755-8794-7-8-S10.pdf [file 1755-8794-7-8-S10.pdf]

**Figure S2:** LD-plots for the 17 unique SNPs identified in the mediation analysis among (A) EOC cases and (B) controls.

A

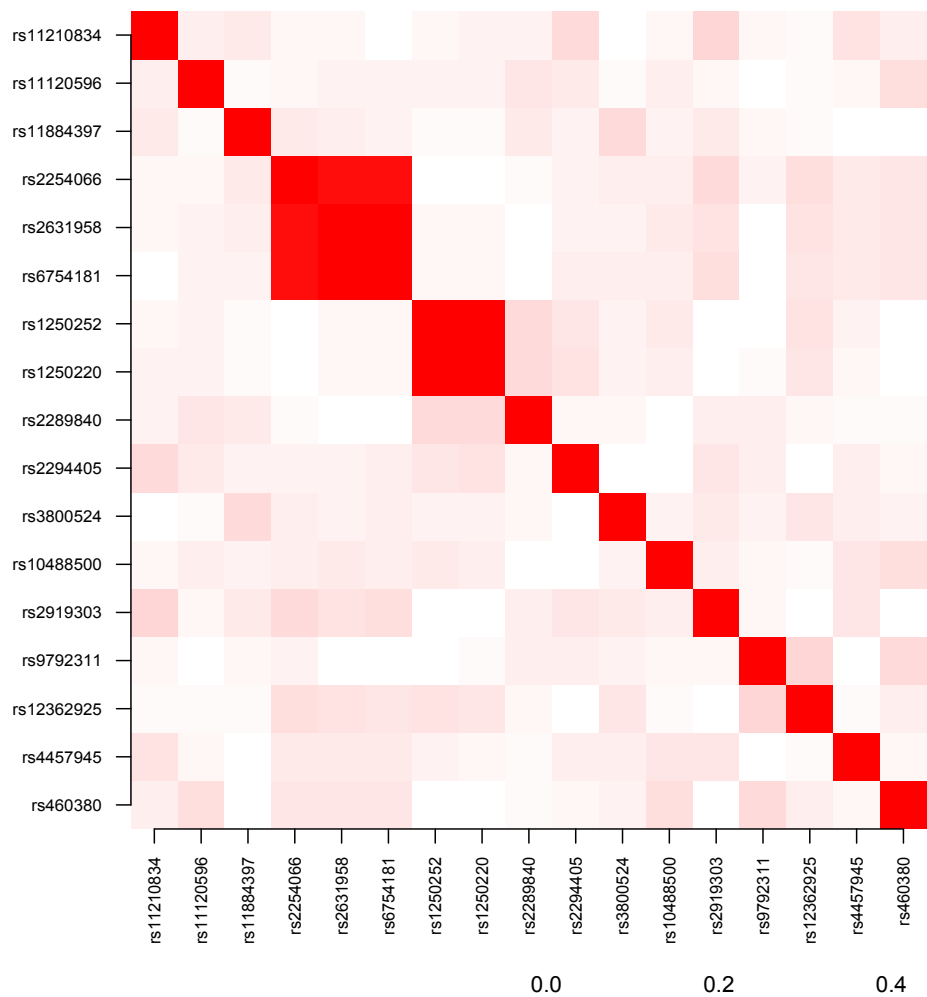

B

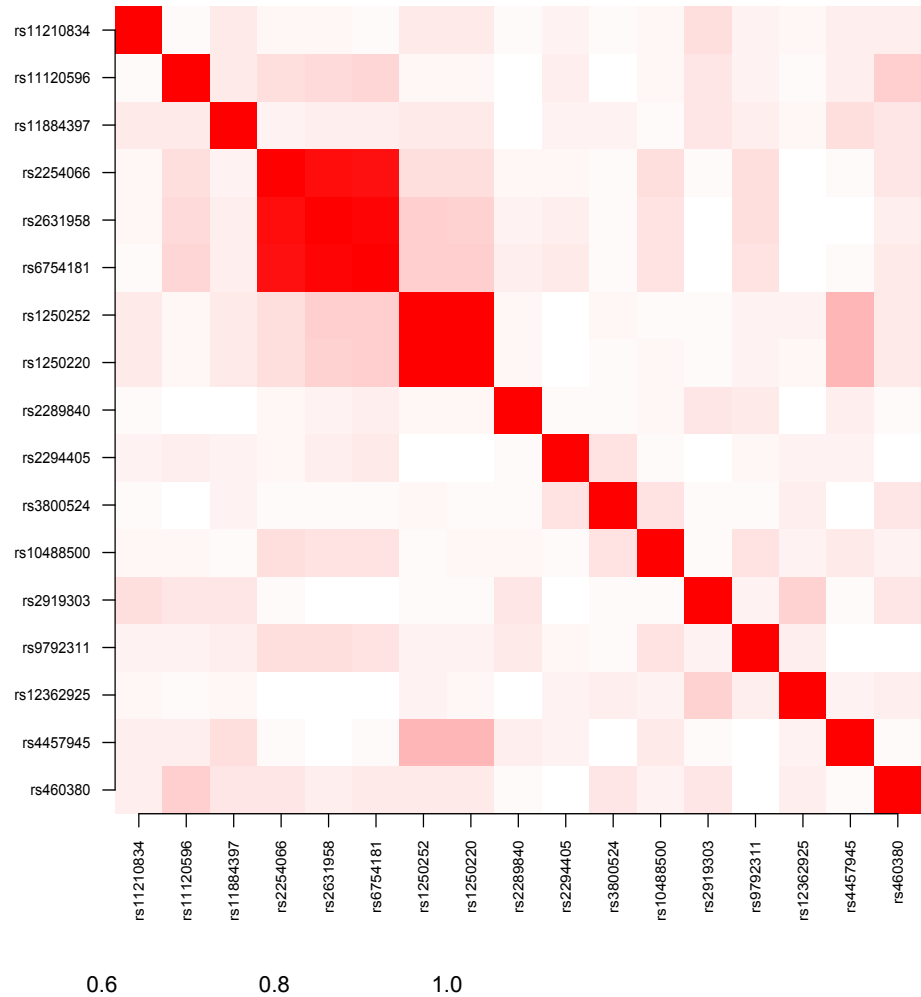

0.0 0.2 0.4 0.6 0.8 1.0

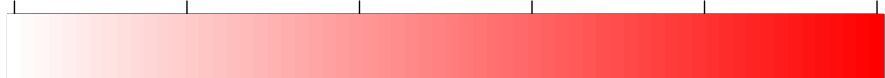

Absolute (correlation)
