# Supplementary material for: Integrative genomic analysis identifies epigenetic marks that mediate genetic risk for epithelial ovarian cancer
Source: PubMed Central journal article supplement (PMC3916313; doi:10.1186/1755-8794-7-8), 2014-01-30

**Figure S3:** Methylation levels of the 13 unique CpGs, identified as potential mediators of genetic risk for EOC, across the various EOC histologies. HS (high-grade serous), LS (low-grade serous), M (mucinous), E (endometriod), and C (clear cell).

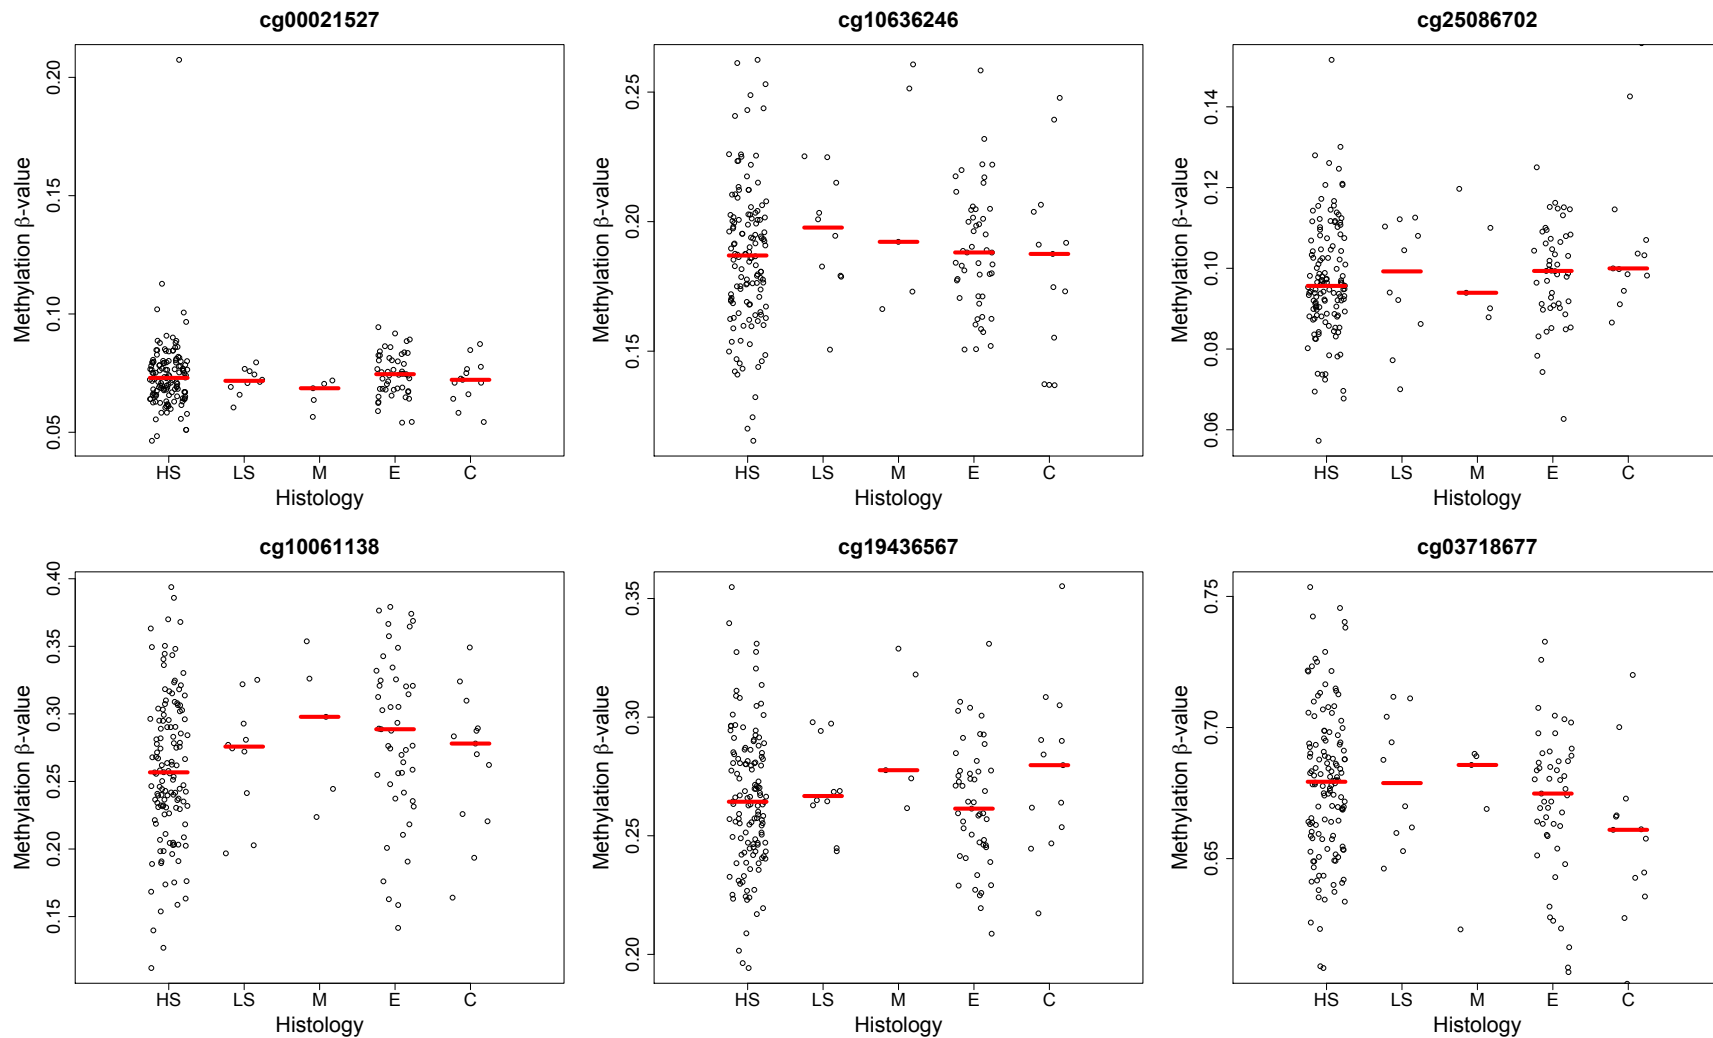

**Figure S2 (cont.)**

**cg25553916**

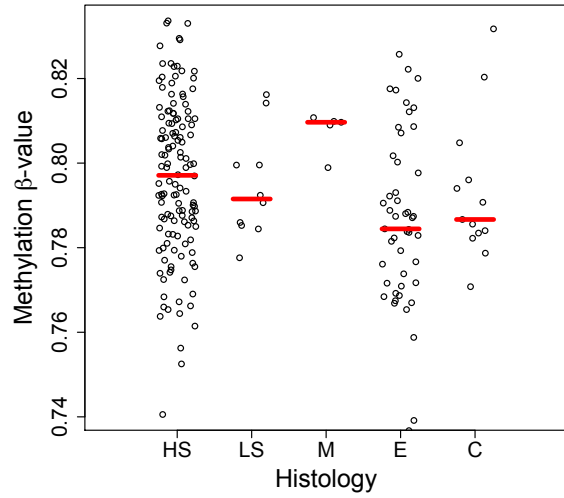

**cg13721560**

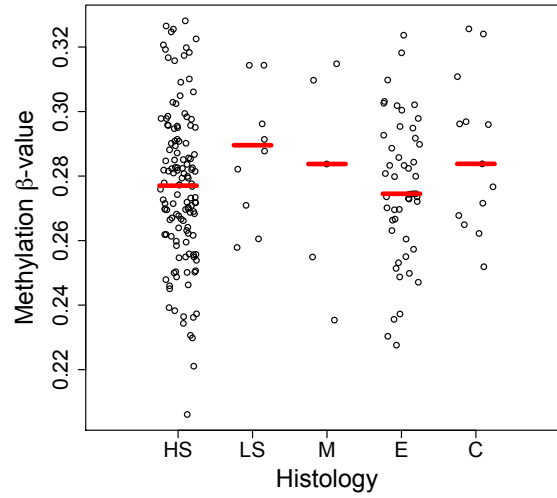

**cg05109049**

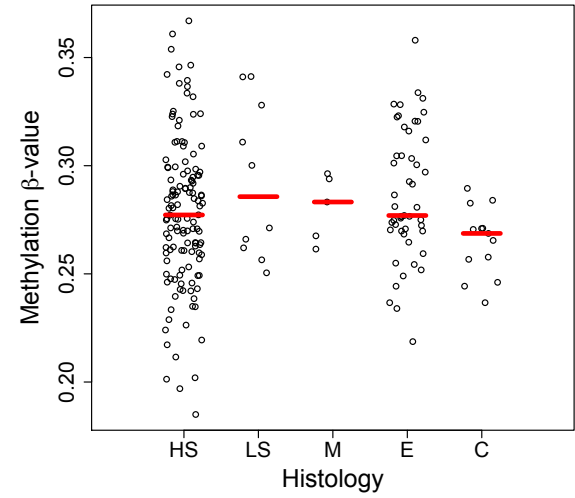

**cg09822001**

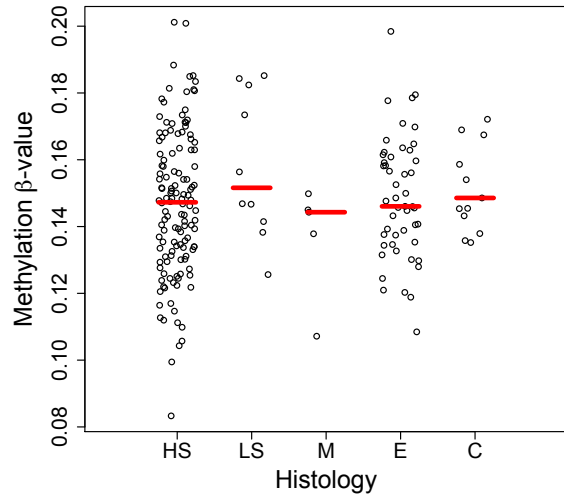

**cg24136586**

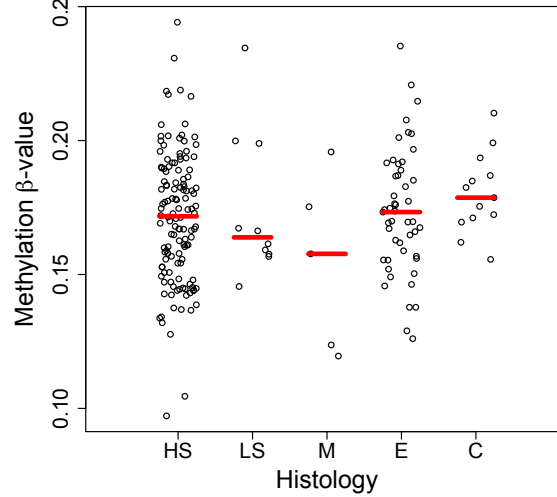

**cg01495509**

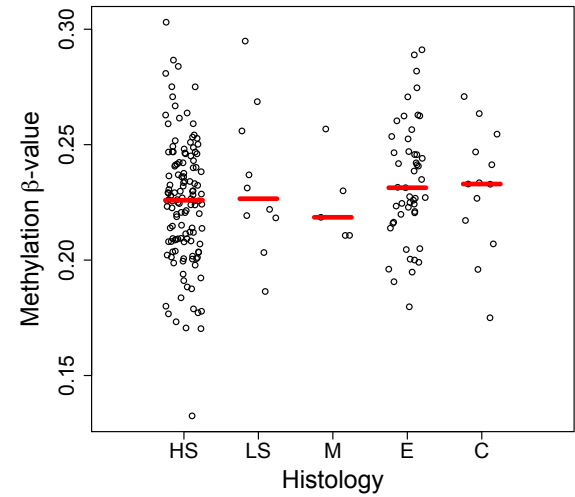

Figure S2 (cont.)

cg08142684

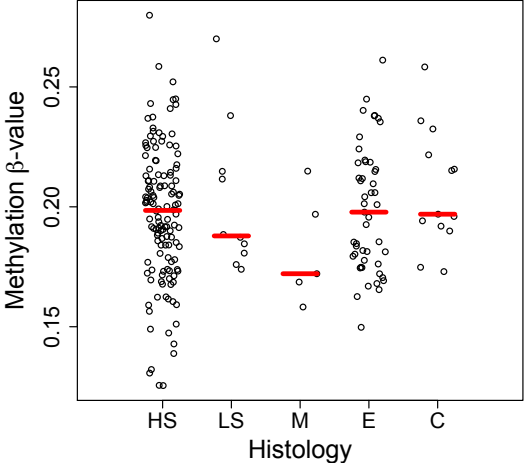

Supplement: 1755-8794-7-8-S11.pdf [file 1755-8794-7-8-S11.pdf]
